# Supplementary material for: Male Differentiation in the Marine Copepod Oithona nana Reveals the Development of a New Nervous Ganglion and Lin12-Notch-Repeat Protein-Associated Proteolysis
Source: MDPI journal article supplement (doi:10.3390/biology10070657), 2021-07-13

# **Male differentiation in the marine copepod *Oithona nana* reveals the development of a new nervous ganglion linked to Lin12-Notch-Repeat protein-associated proteolysis**

Kevin Sugier<sup>1</sup>, Romuald Laso-Jadart<sup>1</sup>, Soheib Kerbach<sup>1</sup>, Jos Kafer<sup>4</sup>, Majda Arif<sup>1</sup>, Laurie Bertrand<sup>2</sup>, Karine Labadie<sup>2</sup>, Nathalie Martins<sup>2</sup>, Celine Orvain<sup>2</sup>, Emmanuelle Petit<sup>2</sup>, Patrick Wincker<sup>1</sup>, Jean-Louis Jamet<sup>3</sup>, Adriana Alberti<sup>2</sup> and Mohammed-Amin Madoui<sup>1</sup>

1. Génomique Métabolique, Genoscope, Institut François Jacob, CEA, CNRS, Univ Evry, Université Paris-Saclay, Evry, France
2. Commissariat à l'Energie Atomique (CEA), Institut François Jacob, Genoscope, Evry, France
3. Université de Toulon, Aix-Marseille Université, CNRS/INSU/IRD, Mediterranean Institute of Oceanography MIO UMR 7294, CS 60584, 83041 Toulon cedex 9, France
4. Laboratoire de Biométrie et Biologie Evolutive, Université Lyon 1, CNRS UMR 5558, France

## Supplementary data

|                                                                                                                              |    |
|------------------------------------------------------------------------------------------------------------------------------|----|
| Supplementary Notes S1: <b>Transcriptomic data</b> .....                                                                     | 3  |
| Supplementary Notes S2: <b>Transcriptomic data quality</b> .....                                                             | 4  |
| Supplementary Notes S3: <b>Experimental design of the protein interaction (PPI) analysis</b> ..                              | 5  |
| Supplementary Notes S4: <b>Primers used for PCR amplification</b> .....                                                      | 6  |
| Supplementary Notes <b>S5. Gene annotation of the sex-determination system associated genes of <i>Oithona nana</i></b> ..... | 8  |
| Supplementary Notes S6: <b>Structure and localisation of the <i>Oithona nana</i> LDPs</b> .....                              | 8  |
| Supplementary Notes S7: <b>Functional annotation of <i>O. nana</i> genes over-expressed in male</b> .<br>.....               | 9  |
| Supplementary Notes S8: <b>Phylogenetic tree of On_IGFBP7</b> .....                                                          | 11 |

# Supplementary Notes S1: **Transcriptomic data.**

RNA-seq quality metrics of the 20 samples. One nauplii sample was discarded after MA plots pairwise comparisons analysis (see Sup note 2).

| Accession<br>Numbers<br>(PRJEB34229) |           | Biological<br>replicate | # Seq clean | # Base clean  | Average size<br>of merged<br>reads (base) |
|--------------------------------------|-----------|-------------------------|-------------|---------------|-------------------------------------------|
| ERX3525067                           | Male      | 1                       | 17,539,769  | 4,726,772,098 | 155                                       |
| ERX3525068                           |           | 2                       | 13,355,099  | 3,594,123,134 | 155                                       |
| ERX3525069                           |           | 3                       | 13,327,828  | 3,697,975,710 | 164                                       |
| ERX3525070                           |           | 4                       | 10,181,747  | 2,833,631,554 | 164                                       |
| ERX3525072                           | Female    | 1                       | 13,443,737  | 3,784,911,561 | 169                                       |
| ERX3525073                           |           | 2                       | 17,565,613  | 4,945,908,456 | 170                                       |
| ERX3525074                           |           | 3                       | 15,129,175  | 4,254,430,406 | 170                                       |
| ERX3525071                           |           | 4                       | 13,152,019  | 3,685,066,788 | 167                                       |
| ERX3525076                           | Copepodid | 1                       | 9,737,697   | 2,683,086,720 | 159                                       |
| ERX3525077                           |           | 2                       | 10,954,752  | 3,090,141,346 | 170                                       |
| ERX3525078                           |           | 3                       | 13,385,311  | 3,732,623,083 | 166                                       |
| ERX3525075                           |           | 4                       | 17,758,141  | 4,731,918,511 | 152                                       |
| ERX3525079                           | Nauplius  | 1                       | 14,280,023  | 3,868,981,343 | 158                                       |
| ERX3525080                           |           | 2                       | 13,034,144  | 3,546,435,298 | 159                                       |
| ERX3525081                           |           | 3                       | 11,718,354  | 3,291,309,412 | 169                                       |
| ERX3525082                           | Egg       | 1                       | 16,670,807  | 4,457,103,808 | 153                                       |
| ERX3525083                           |           | 2                       | 14,351,720  | 3,906,557,216 | 159                                       |
| ERX3525084                           |           | 3                       | 12,333,551  | 3,284,934,971 | 152                                       |
| ERX3525085                           |           | 4                       | 17,427,615  | 4,468,263,185 | 142                                       |
| ERX3525086                           |           | 5                       | 16,156,218  | 4,271,517,322 | 150                                       |

## Supplementary Notes S2: **Transcriptomic data quality.**

MA plots pairwise comparisons between the five developmental stages. One nauplius sampled showing a biased read count distribution was discarded.

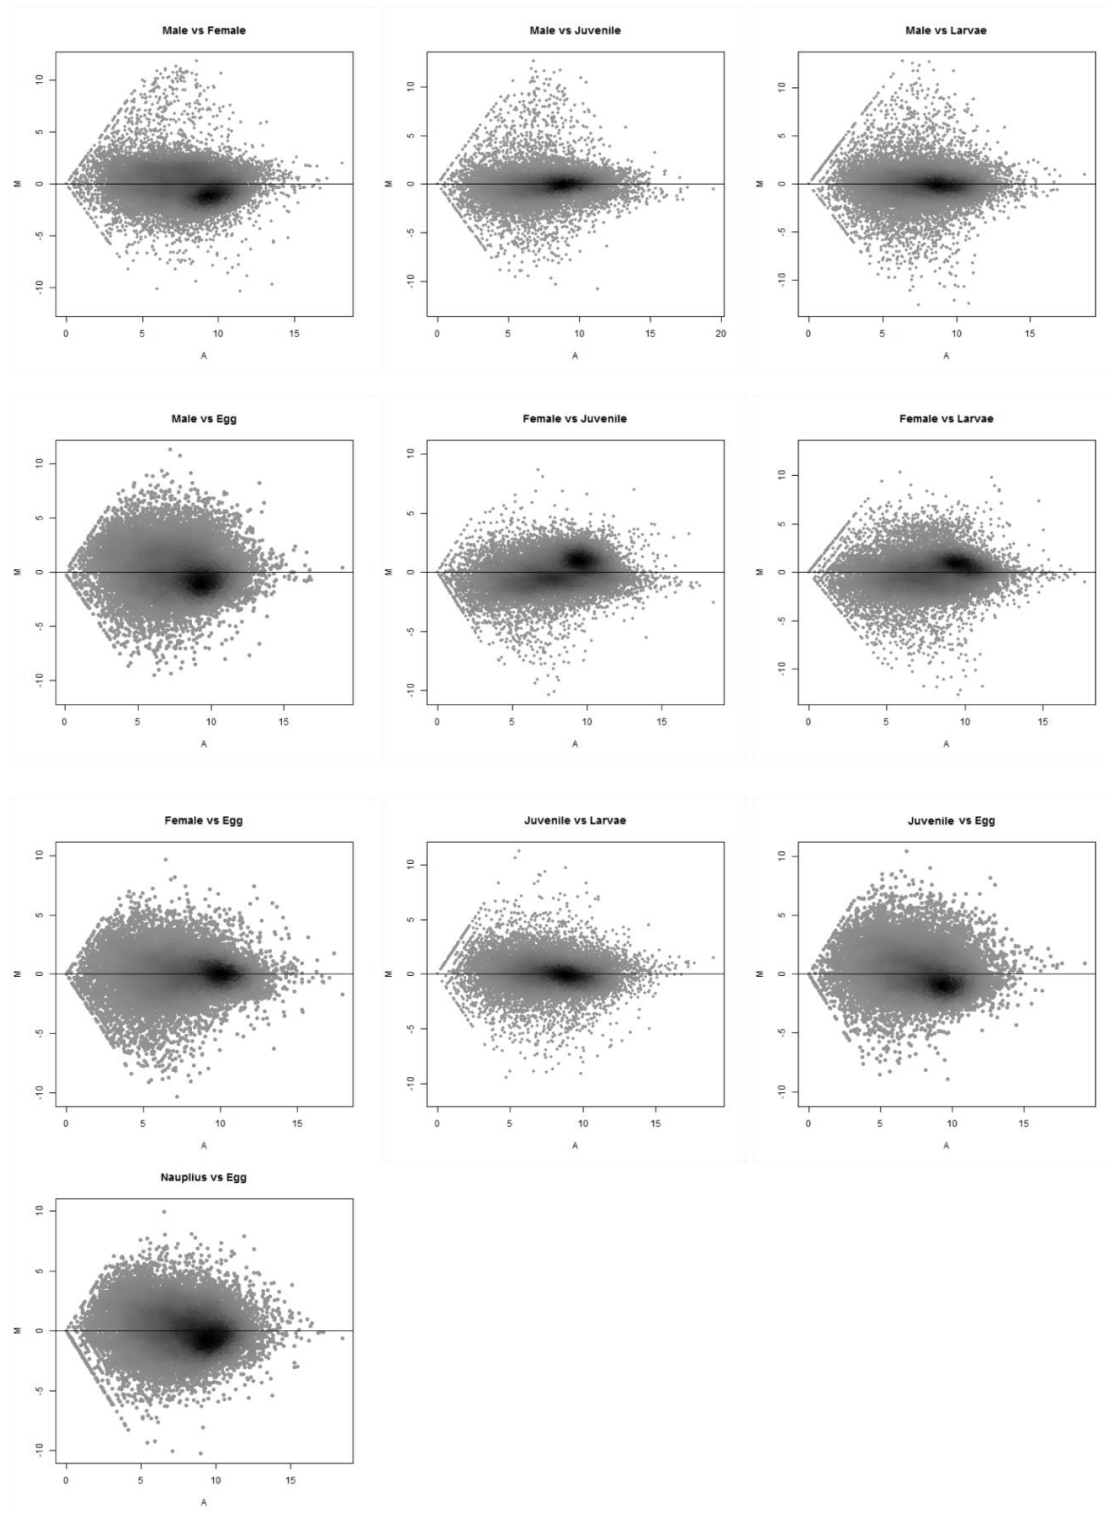

Supplementary Notes S3: **Experimental design of the protein interaction (PPI) analysis.**

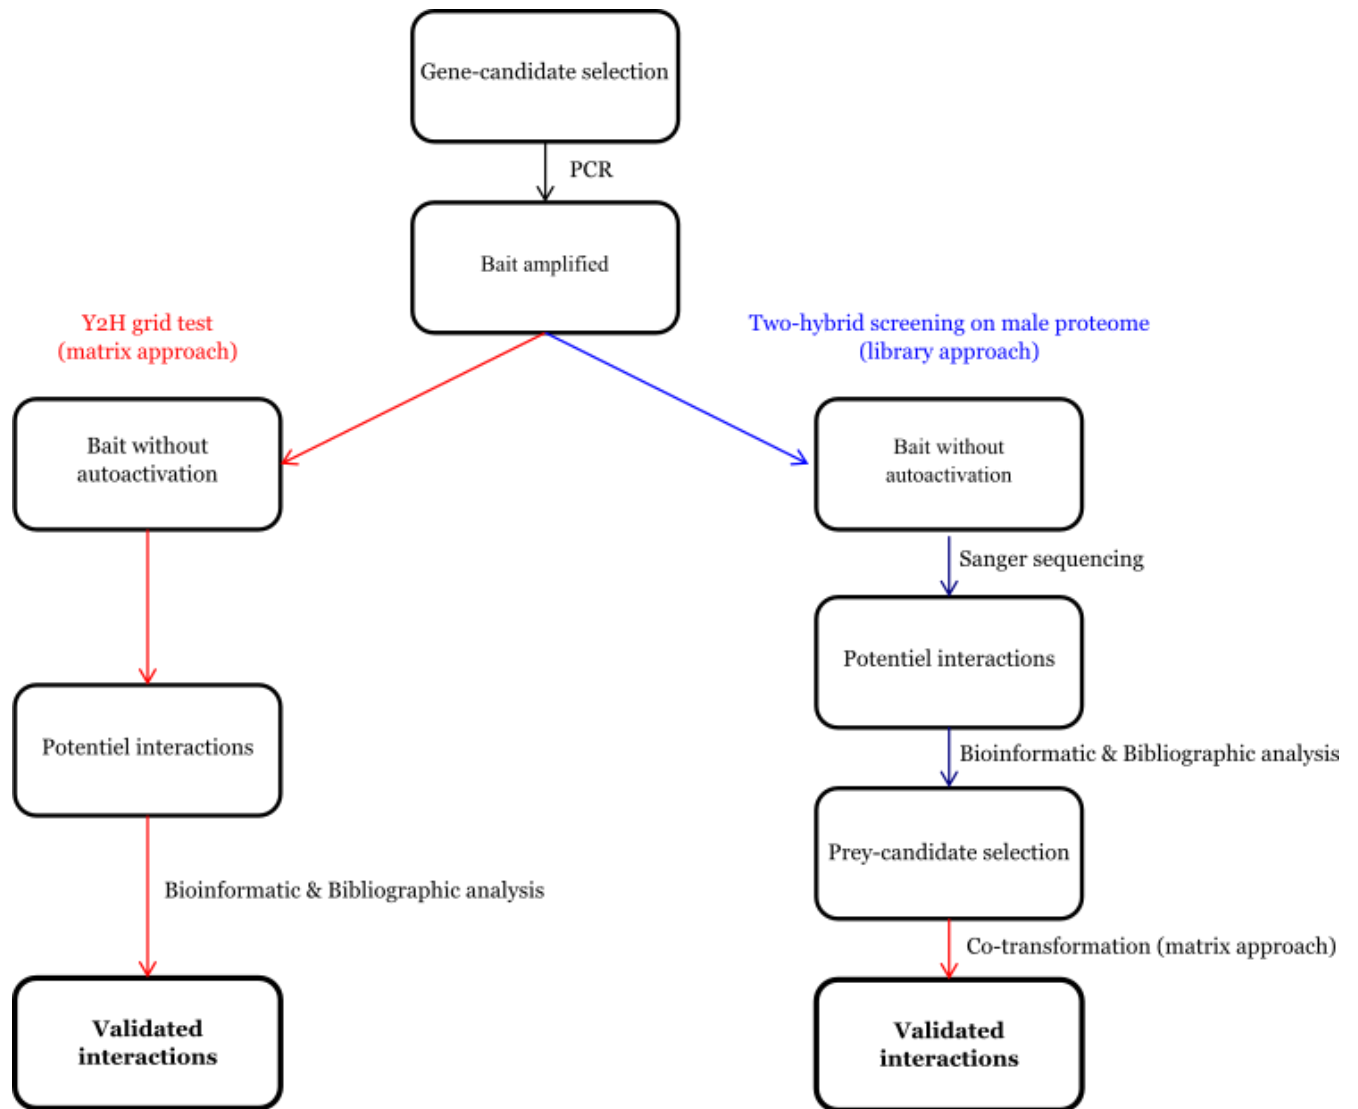

# Supplementary Notes S4: Primers used for PCR amplification.

The first table contains the primers used for bait amplification; the second contains the prey ones.

| Gene       | Elongation direction | Primer                                           |
|------------|----------------------|--------------------------------------------------|
| On_LDPG1   | Forward              | ATGGCCATGGAGGCCGAATTCCTTCCAGGATTGTGGAAACTTG      |
|            | Reverse              | CCGCTGCAGGTCGACGGATCCGCGAATACATTGGCAAATGGTACA    |
| On_LDPG2   | Forward              | ATGGCCATGGAGGCCGAATTCCTTATTGCCAAGCCTGTGGT        |
|            | Reverse              | CCGCTGCAGGTCGACGGATCCGGTTTGAGGATACCACCGATAATC    |
| On_IGFBP7  | Forward              | ATGGCCATGGAGGCCGAATTCCAACGTCGTCCACATGCCCCAAAT    |
|            | Reverse              | CCGCTGCAGGTCGACGGATCCCAATTCTTTACTATAAACGCCCAC    |
| 4.25.1     | Forward              | ATGGCCATGGAGGCCGAATTCCTTAAATGATTCTATCAGATCGC     |
|            | Reverse              | CCGCTGCAGGTCGACGGATCCTTCTTAGAATGATTTTATCATT      |
| 19.110.1   | Forward              | ATGGCCATGGAGGCCGAATTCATGTCTAGTATCATATTTTAAATC    |
|            | Reverse              | CCGCTGCAGGTCGACGGATCCGAGTCTAAACAATGATCAATTAC     |
| 49.77.3    | Forward              | ATGGCCATGGAGGCCGAATTCCTTCACTTTCAACTTGAAAC        |
|            | Reverse              | CCGCTGCAGGTCGACGGATCCGAACTGGAAAATGTGGGGAATGAG    |
| 45.413.1   | Forward              | ATGGCCATGGAGGCCGAATTCCTGTGTAGGCTGCGGAGAATACCCA   |
|            | Reverse              | CCGCTGCAGGTCGACGGATCCTTGACCGGATGTGCGAGGTGGAGG    |
| 2085.199.1 | Forward              | ATGGCCATGGAGGCCGAATTCCTTAAACCACCACCCCTATTGATCTA  |
|            | Reverse              | CCGCTGCAGGTCGACGGATCCCGTGGCAATGTGCTAAATTGAGA     |
| 12.180.1   | Forward              | ATGGCCATGGAGGCCGAATTCCTTGCCTTCTACTGTTTCCGACAAT   |
|            | Reverse              | CCGCTGCAGGTCGACGGATCCCGTGGCAATGTGCTAAATTGAGA     |
| 94.274.1   | Forward              | ATGGCCATGGAGGCCGAATTCCTGATGATGGAGGATGTGCTTTTAGG  |
|            | Reverse              | CCGCTGCAGGTCGACGGATCCAGATGATCCTGTAGTGGTTGCGGT    |
| 1921.111.1 | Forward              | ATGGCCATGGAGGCCGAATTCCTGATACCCGAGTTTCAATTTGATGGA |
|            | Reverse              | CCGCTGCAGGTCGACGGATCCATCAGGATGAAAGGTGCAGTCTTG    |

| Gene       | Elongation direction | Primer                                          |
|------------|----------------------|-------------------------------------------------|
| On_LDPG1   | Forward              | GCCATGGAGGCCAGTGAATTCCTTCCAGGATTTGTTGGAAACTTG   |
|            | Reverse              | CAGCTCGAGCTCGATGGATCCGCGAATACATTGGCAAATGGTACA   |
| On_LDPG2   | Forward              | GCCATGGAGGCCAGTGAATTCCTTGAACCTTGCTTTTATGATGGA   |
|            | Reverse              | CAGCTCGAGCTCGATGGATCCGAGCTCTAAACAATGATCAATTAC   |
| On_IGFBP7  | Forward              | GCCATGGAGGCCAGTGAATTCCAACGTCGTCCACATGCCCCAAAT   |
|            | Reverse              | CAGCTCGAGCTCGATGGATCCCAATTCTTTACTATAAACGCCCAC   |
| 4.25.1     | Forward              | GCCATGGAGGCCAGTGAATTCCTACTAAAATGATTCTATCAGATCGC |
|            | Reverse              | CAGCTCGAGCTCGATGGATCCCTTCTTCTAGAATGATTTTATCATT  |
| 19.110.1   | Forward              | GCCATGGAGGCCAGTGAATTCCTACTAAAATGATTCTATCAGATCGC |
|            | Reverse              | CAGCTCGAGCTCGATGGATCCGAAATCAAAAGGGTTTGGCACATT   |
| 49.77.3    | Forward              | GCCATGGAGGCCAGTGAATTCCTCCACAATACTTTCAACTTGGAAAC |
|            | Reverse              | CAGCTCGAGCTCGATGGATCCGAACTGGAAAAATGTGGGGAATGAG  |
| 45.413.1   | Forward              | GCCATGGAGGCCAGTGAATTCCTATGGACTTCAATTCCATTATGAA  |
|            | Reverse              | CAGCTCGAGCTCGATGGATCCCTTGACCGGATGTCGGAGGTGGAGG  |
| 2085.199.1 | Forward              | GCCATGGAGGCCAGTGAATTCCTTAACCACCACCCCTATTGATCTA  |
|            | Reverse              | CAGCTCGAGCTCGATGGATCCCGTGGAATGTGCTAAATTGAGA     |
| 12.180.1   | Forward              | GCCATGGAGGCCAGTGAATTCCTTGCCCTTTCAGTGTTCGACAAT   |
|            | Reverse              | CAGCTCGAGCTCGATGGATCCAGTTACAATGCATTACAAACTTT    |
| 94.274.1   | Forward              | GCCATGGAGGCCAGTGAATTCCTGATGATGGAGGATGTGCTTTAGG  |
|            | Reverse              | CAGCTCGAGCTCGATGGATCCAGATGATCCTGTAGTGGTTGCGGT   |
| 1921.111.1 | Forward              | GCCATGGAGGCCAGTGAATTCCTGTACCCGAGTTTCAATTTGATGGA |
|            | Reverse              | CAGCTCGAGCTCGATGGATCCATCAGGATGAAAGGTGCAGTCTTG   |

Supplementary Notes S5. **Gene annotation of the sex-determination system associated genes of *Oithona nana***

| Gene                  | Diamond blast NR                                                         | InterProScan domains                                     | RPKM average 1 |
|-----------------------|--------------------------------------------------------------------------|----------------------------------------------------------|----------------|
| 7.623.1               | No hits                                                                  |                                                          | ~5             |
| 34.133.1              | No hits                                                                  |                                                          | ~25            |
| 39.231.1              | No hits                                                                  |                                                          | ~50            |
| 87.175.1              | No hits                                                                  |                                                          | ~60            |
| 45.363.1              | No hits                                                                  | PAN domain                                               | ~100           |
| 25.213.1              | No hits                                                                  |                                                          | ~475           |
| 664.74.1              | No hits                                                                  |                                                          | ~500           |
| 27.64.1               | No hits                                                                  |                                                          | ~600           |
| 41.148.1              | No hits                                                                  |                                                          | ~1200          |
| 119.249.1             | putative protein LLP homolog isoform X1 [ <i>Acartia pacifica</i> ]      | Learning-associated protein                              | ~1800          |
| On_ATP <sub>5</sub> H | ATP synthase subunit d, mitochondrial-like [ <i>Eurytemora affinis</i> ] | ATP synthase D chain, mitochondrial (ATP <sub>5</sub> H) | ~7500          |

Supplementary Notes S6: **Structure and localisation of the *Oithona nana* LDPs.**

*e*, *i* and *m* correspond to extracellular, intracellular and membranous respectively.

| Protein name            | Protein size (aa) | #Total LNR domain<br>(#canonical LNR - # LNR-like) | Other InterPro domains        | Localisation |
|-------------------------|-------------------|----------------------------------------------------|-------------------------------|--------------|
| 100:211670..212713      | 328               | 3 (1-2)                                            | -                             | e            |
| 11.480.1:721370..723090 | 531               | 1 (0-1)                                            | Metallo-peptidase family M12  | e            |
| 12.169.2:773247..776065 | 808               | 5 (5-0)                                            | Trypsin                       | e            |
| 12.175.1                | 386               | 1 (0-1)                                            | Trypsin                       | e            |
| 12.182.1                | 445               | 2 (0-2)                                            | Trypsin                       | e            |
| 12.185.1                | 357               | 1 (0-1)                                            | Trypsin                       | e            |
| 123:42215..42819        | 181               | 2 (0-2)                                            | -                             | e            |
| 1239:190..1043          | 228               | 2 (0-2)                                            | -                             | e            |
| 14.373.1:814017..816142 | 226               | 2 (0-2)                                            | -                             | e            |
| 1531:53..2073           | 222               | 3 (0-3)                                            | -                             | e            |
| 1646:48..560            | 147               | 1 (0-1)                                            | -                             | e            |
| 174:49279..49938        | 219               | 3 (0-3)                                            | -                             | e            |
| 1781:78..483            | 113               | 1 (1-0)                                            | Metallo-peptidase family M12B | e            |
| 18.220.1:802020..803354 | 420               | 1 (0-1)                                            | Trypsin                       | e            |
| 188.202.1:42571..49247  | 547               | 2 (2-0)                                            | -                             | e            |
| 19.334.1                | 365               | 4 (1-3)                                            | -                             | e            |
| 2.84.1                  | 195               | 2 (1-1)                                            | Trypsin                       | e            |
| 20.537.1                | 353               | 2 (1-1)                                            | -                             | e            |
| 2085.199.1              | 687               | 6 (0-6)                                            | -                             | e            |
| 21.77.1:327349..328866  | 458               | 2 (1-1)                                            | Trypsin                       | e            |
| 2201:1341..2883         | 426               | 3 (0-3)                                            | -                             | e            |
| On_LDP1                 | 378               | 2 (1-1)                                            | Trypsin                       | e            |
| 27:531099..531903       | 248               | 2 (0-2)                                            | -                             | e            |
| 32.270.1:20364..22049   | 561               | 2 (0-2)                                            | -                             | e            |
| 3256:80..502            | 140               | 1 (0-1)                                            | -                             | e            |
| 37:34427..34747         | 107               | 1 (0-1)                                            | -                             | e            |
| 3704.33.1               | 266               | 1 (0-1)                                            | Metallo-peptidase family M12  | e            |
| 3765:1004..2202         | 383               | 1 (0-1)                                            | -                             | e            |



|                          |      |           |                                                 |   |
|--------------------------|------|-----------|-------------------------------------------------|---|
| 38:505765..507559        | 438  | 5 (0-5)   | -                                               | e |
| 3888:228..1050           | 202  | 2 (1-1)   | -                                               | e |
| 4.222.1                  | 525  | 2 (0-2)   | Metallo-peptidase family M12                    | e |
| 4.25.1                   | 90   | 1 (0-1)   | -                                               | e |
| 41:85441..86498          | 276  | 2 (0-2)   | -                                               | e |
| 42.291.1                 | 122  | 1 (0-1)   | -                                               | e |
| 45.412.1                 | 262  | 1 (0-1)   | Trypsin                                         | e |
| 45.424.1                 | 139  | 1 (0-1)   | -                                               | e |
| 4546:128..817            | 229  | 3 (0-3)   | -                                               | e |
| 48.267.1:6982..8492      | 461  | 2 (0-2)   | Trypsin                                         | e |
| 48.344.1                 | 525  | 2 (1-1)   | Metallo-peptidase family M12                    | e |
| 54.120.2:255915..258850  | 940  | 7 (0-7)   | -                                               | e |
| 55:11070..12199          | 357  | 4 (0-4)   | -                                               | e |
| 57.114.1                 | 159  | 2 (1-1)   | -                                               | e |
| 6.168.1:380139..381062   | 227  | 1 (0-1)   | Metallo-peptidase family M12B                   | e |
| 68.40.1                  | 493  | 1 (0-1)   | Metallo-peptidase family M12                    | e |
| 821:3497..4457           | 291  | 6 (0-6)   | -                                               | e |
| On_LDP2                  | 116  | 1 (0-1)   | -                                               | e |
| 92.33.1:248003..248641   | 213  | 2 (0-2)   | -                                               | e |
| 98.272.1                 | 74   | 1 (1-0)   | -                                               | e |
| 99.319.1:158136..159228  | 344  | 1 (0-1)   | Trypsin                                         | e |
| 12.180.1                 | 489  | 2 (0-2)   | Trypsin                                         | i |
| 126.234.1                | 823  | 2 (0-2)   | -                                               | i |
| 14:255249..255707        | 252  | 1 (0-1)   | -                                               | i |
| 15.286.1                 | 207  | 2 (0-2)   | -                                               | i |
| 1807:1535..3342          | 517  | 1 (0-1)   | -                                               | i |
| 188:49497..50375         | 177  | 1 (1-0)   | -                                               | i |
| 1921.111.1               | 137  | 1 (0-1)   | -                                               | i |
| 2.15.1:36291..38976      | 767  | 13 (0-13) | -                                               | i |
| 2.380.1:1294082..1295071 | 329  | 2 (0-2)   | -                                               | i |
| 20.536.3                 | 1083 | 1 (0-1)   | Kelch motif                                     | i |
| 2184:300..2200           | 310  | 1 (0-1)   | Ankyrin repeat-containing domain superfamily    | i |
| 2277:24..1778            | 518  | 8 (0-8)   | -                                               | i |
| 23.148.2                 | 460  | 2 (0-2)   | Metallo-peptidase family M12                    | i |
| 243.135.1                | 316  | 2 (0-2)   | -                                               | i |
| 284.43.1                 | 132  | 1 (0-1)   | -                                               | i |
| 468:255..2448            | 602  | 1 (0-1)   | PAN/Apple domain ; Kelch motif                  | i |
| 541.168.1                | 1564 | 7 (3-4)   | -                                               | i |
| 556:85..5023             | 1494 | 6 (0-6)   | TSP1 ; Kelch-typ_b-propeller                    | i |
| 60:181372..182580        | 402  | 1 (0-1)   | -                                               | i |
| 94.274.1:231104..233771  | 867  | 4 (0-4)   | Lectin                                          | i |
| 147.226.2                | 266  | 3 (0-3)   | -                                               | m |
| 36:371592..372773        | 336  | 1 (0-1)   | -                                               | m |
| On_Notch                 | 2147 | 3(3-0)    | Notch protein                                   | m |
| 59:239420..240555        | 358  | 2 (0-2)   | -                                               | m |
| 76.32.1:162363..164050   | 435  | 4 (0-4)   | Thrombospondin type-1 (TSP1) repeat superfamily | m |
| 96.130.1:322..1331       | 262  | 2 (0-2)   | Lectin                                          | m |

Supplementary Notes S7: **Functional annotation of *O. nana* genes over-expressed in male.**

| Protein functional groups                               | Protein homology                                        | Number of male-specific genes |
|---------------------------------------------------------|---------------------------------------------------------|-------------------------------|
| Neuropeptide and hormone metabolism                     | Allatostatin precursor protein                          | 1                             |
|                                                         | Carboxypeptidase E                                      | 1                             |
|                                                         | Furin-like protease                                     | 1                             |
|                                                         | Neuroendocrine convertase 2                             | 1                             |
|                                                         | Peptidyl-alpha-hydroxyglycine alpha-amidating lyase     | 1                             |
|                                                         | Peptidylglycine alpha-hydroxylating monooxygenase-like  | 1                             |
|                                                         | ITG-like peptide                                        | 1                             |
|                                                         | Sulfoacetaldehyde acetyltransferase                     | 1                             |
| <b>Total</b>                                            |                                                         | <b>8</b>                      |
| Neuropeptide and hormone transport and release          | Bestrophin 1                                            | 1                             |
|                                                         | Excitatory amino acid transporter 1                     | 1                             |
|                                                         | Multiple C2 and transmembrane domain-containing protein | 1                             |
|                                                         | Sodium- and chloride-dependent GABA transporter 1-like  | 1                             |
|                                                         | Synaptic vesicular amine transporter                    | 1                             |
|                                                         | Synaptobrevin                                           | 1                             |
|                                                         | Synaptotagmin                                           | 1                             |
|                                                         | Synaptosomal-associated protein 25-like                 | 1                             |
| <b>Total</b>                                            |                                                         | <b>9</b>                      |
| Neuropeptide and hormone receptors                      | FMRFamide receptor                                      | 6                             |
|                                                         | Muscarinic acetylcholine receptor                       | 1                             |
|                                                         | GABA receptor subunit                                   | 2                             |
|                                                         | Glycine receptor subunit                                | 2                             |
|                                                         | Ionotropic glutamate receptor subunit                   | 2                             |
|                                                         | Capa receptor                                           | 1                             |
|                                                         | Octopamine receptor subunit                             | 1                             |
|                                                         | Corticotropin hormone receptor                          | 1                             |
| <b>Total</b>                                            |                                                         | <b>17</b>                     |
| Neuron polarization Current propagation and ion channel | Kv channel-interacting protein 1-like                   | 2                             |
|                                                         | Potassium voltage-gated channel, Shab-related subfamily | 2                             |
|                                                         | Transient receptor potential protein                    | 1                             |
|                                                         | Two pore potassium channel protein sup-9                | 1                             |
| <b>Total</b>                                            |                                                         | <b>6</b>                      |
| Neuron development Synapse assembly                     | Beta-1,4-glucuronyltransferase 1                        | 1                             |
|                                                         | Microtubule-associated protein futsch-like              | 1                             |
|                                                         |                                                         | 1                             |
|                                                         | Neural/ectodermal development factor IMP-L2-like        | 1                             |
|                                                         | zwei Ig domain protein                                  | 2                             |
|                                                         | copine-like                                             | 1                             |
|                                                         | synaptogenesis syg-2                                    | 1                             |
| <b>Total</b>                                            |                                                         | <b>8</b>                      |
| <b>Total</b>                                            |                                                         | <b>48</b>                     |

### Supplementary Notes S8: **Phylogenetic tree of On\_IGFBP7.**

The numbers at internal branches show the bootstrap branch support (100). We used NCBI data from *Mus musculus* (mouse), *Danio rerio* (danre) and *Bos taurus* (bovin).

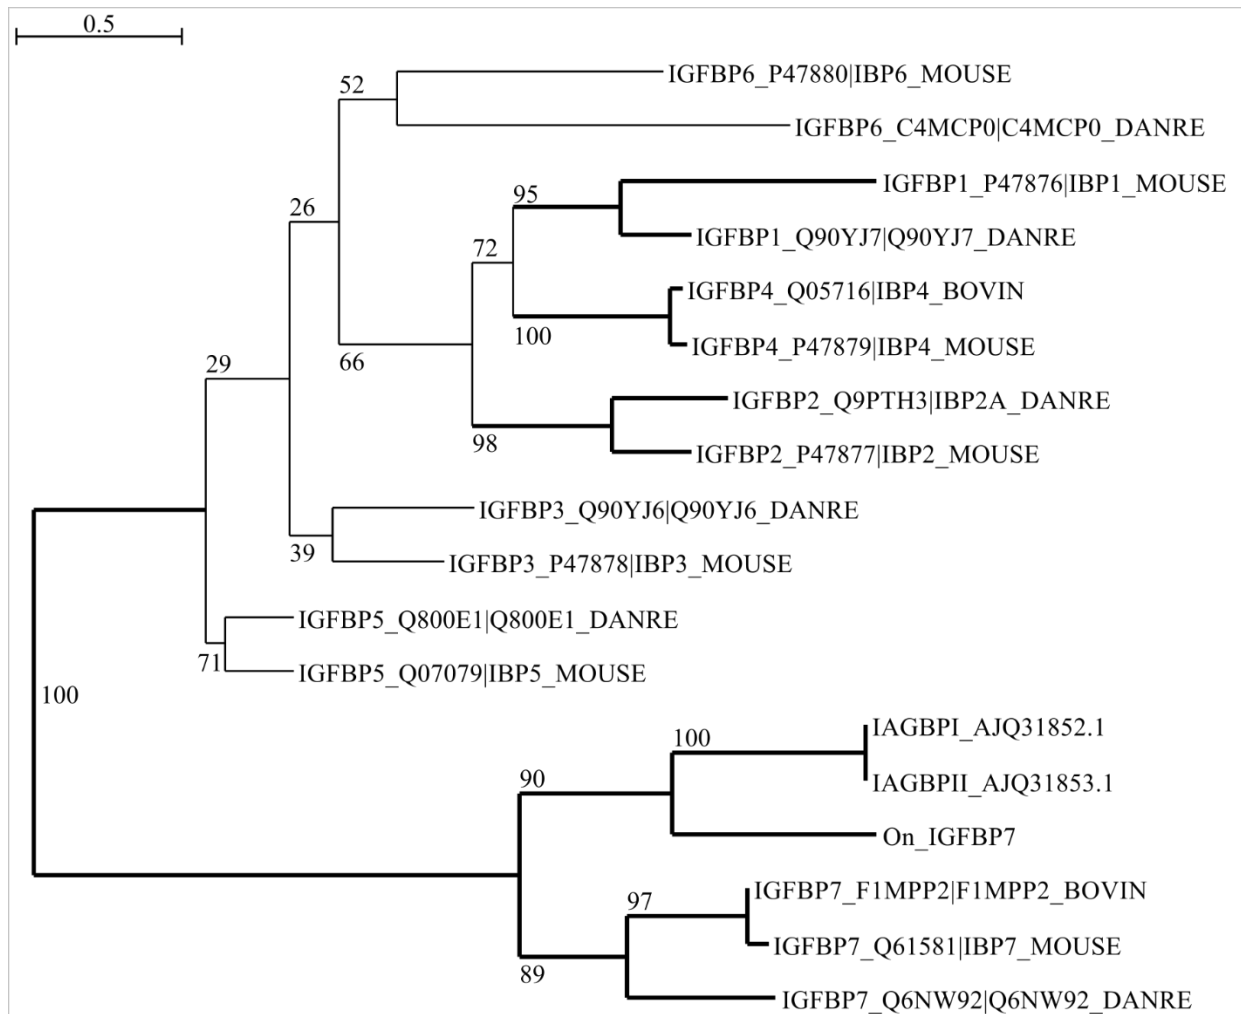

Supplement: s1 [file s1]
